# Supplementary material for: MicroRNA-7/NF-κB signaling regulatory feedback circuit regulates gastric carcinogenesis
Source: PubMed Central journal article supplement — J Cell Biol. 2015 Aug 17;210(4):613–27. doi: 10.1083/jcb.201501073 (PMC4539989; doi:10.1083/jcb.201501073), 2015-08-17
Supplement: supp_jcb.201501073_JCB_201501073_sm.pdf [file supp_jcb.201501073_JCB_201501073_sm.pdf]

Zhao et al., <http://www.jcb.org/cgi/content/full/jcb.201501073/DC1>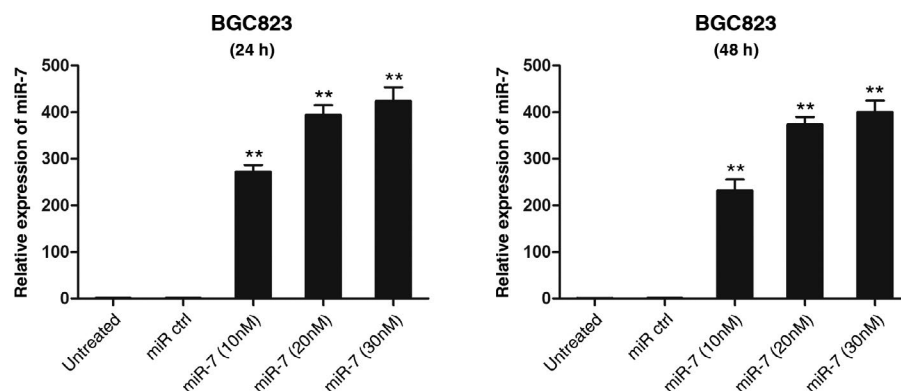

Figure S1. **The transfection efficiency of an miR-7 mimic in BGC823 cells.** Real-time PCR analysis for miR-7 expression in BGC823 cells after miR-7 mimic (miR-7) or miRNA mimic negative control (miR ctrl) transfection for 24 and 48 h ( $n = 3$ ). Means  $\pm$  SD (error bars) of three experiments performed in triplicates are shown. \*\*,  $P < 0.01$ .

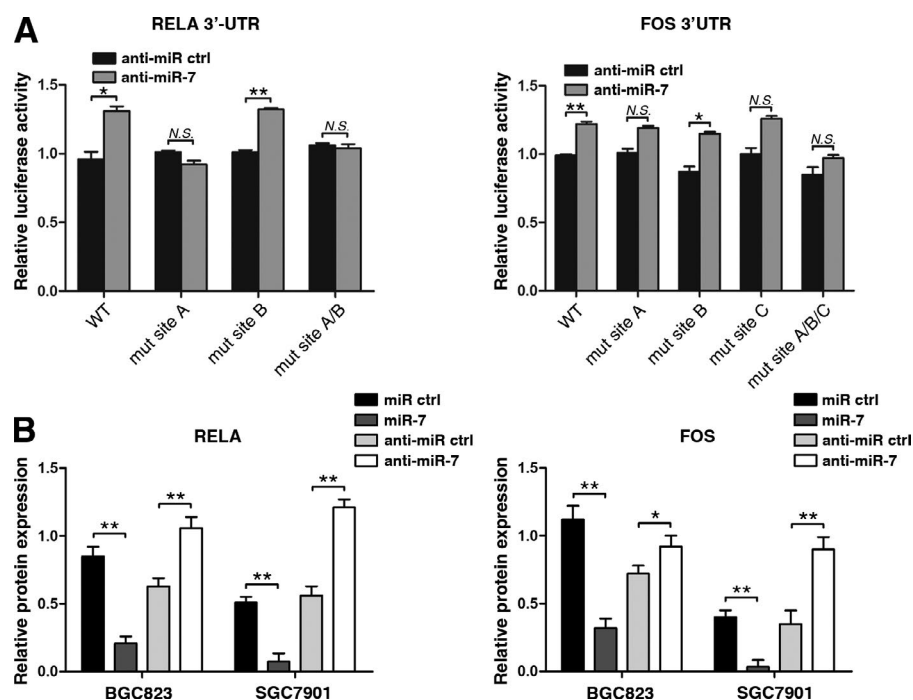

Figure S2. **miR-7 directly targets REL A and FOS 3'-UTR.** (A) Relative luciferase activity levels in BGC823 cells cotransfected with miR-7 inhibitor (anti-miR-7) or miRNA inhibitor negative control (anti-miR ctrl) and wild-type (WT) or mutant (mut) *REL A* and *FOS* 3'-UTR vectors. Means  $\pm$  SD (error bars) of three experiments performed in triplicates are shown. (B) The densitometric analysis of Western blot bands for Fig. 2 C and the ratios of the protein/ $\beta$ -actin intensities were plotted. Means  $\pm$  SD of three independent experiments are shown. \*,  $P < 0.05$ ; \*\*,  $P < 0.01$ ; N.S., not significant ( $P > 0.05$ ).

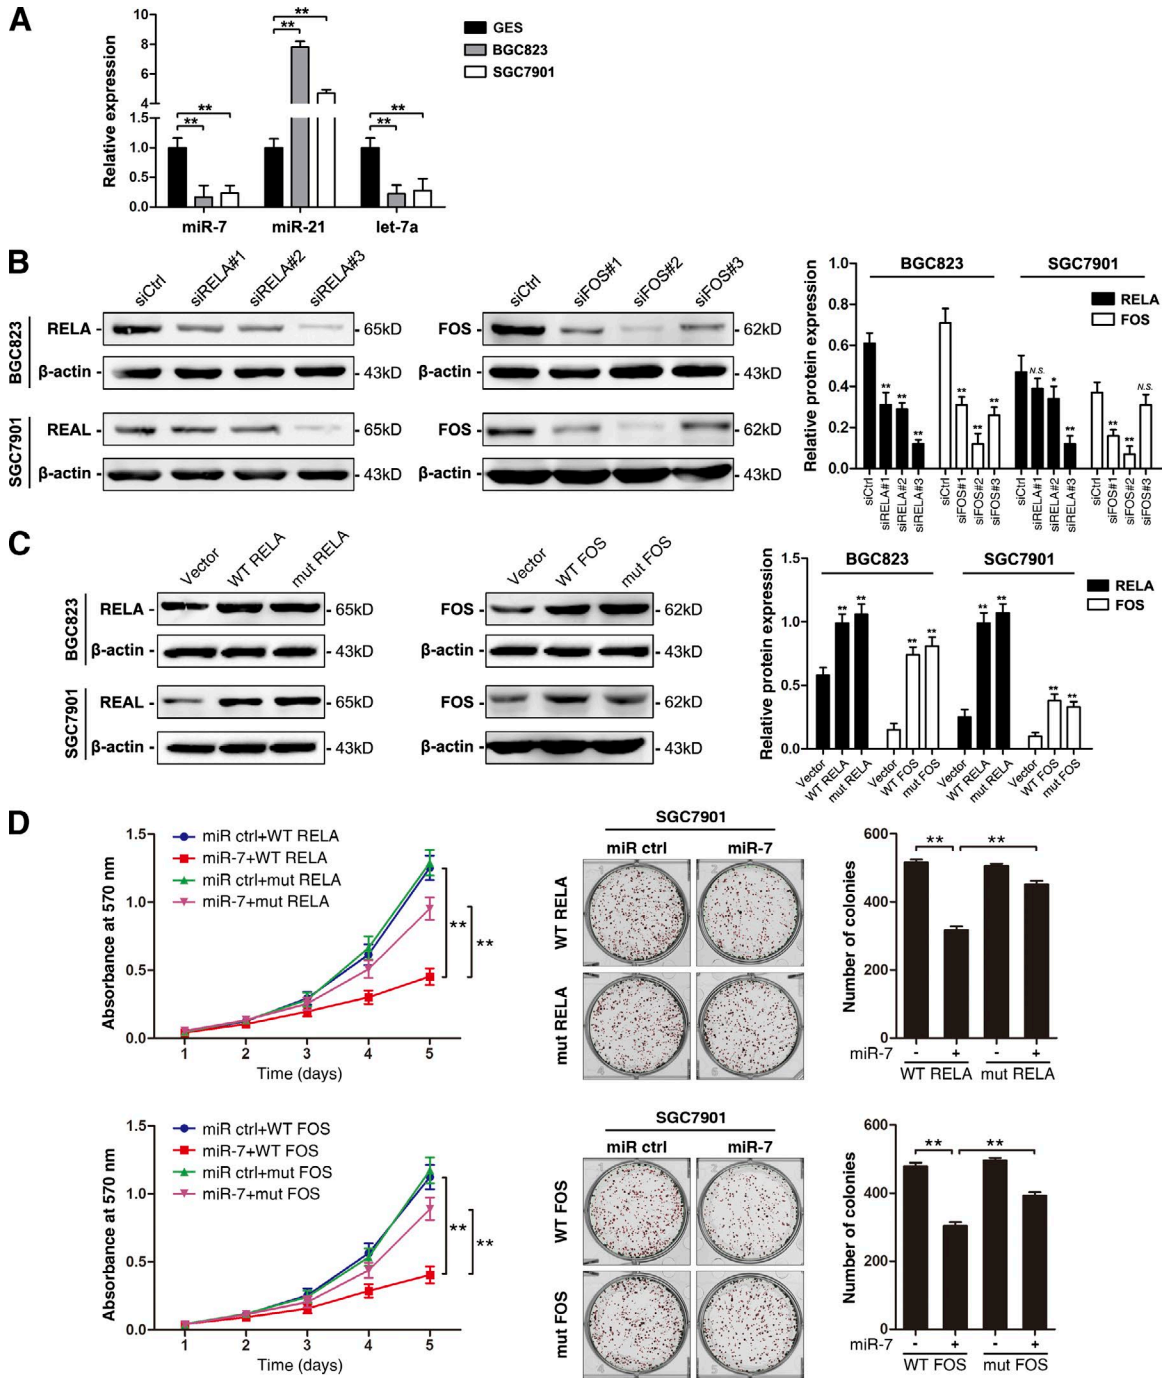

Figure S3. **Knockdown and overexpression of RELA and FOS and their effects on the growth of GC cells.** (A) Real-time PCR analysis of miR-7, miR-21, and let-7a expression in GES, BGC823, and SGC7901 cells. Means  $\pm$  SD (error bars) of three experiments performed in triplicates are shown. (B, left) Transfection of RELA or FOS siRNAs significantly decreased RELA or FOS protein levels in BGC823 and SGC7901 cells. (right) The ratios of the protein/ $\beta$ -actin intensities were plotted. Means  $\pm$  SD of three independent experiments are shown. (C, left) Transfection of RELA or FOS vectors containing wild-type or mutant 3'-UTR increased RELA or FOS protein levels in BGC823 and SGC7901 cells. (right) The ratios of the protein/ $\beta$ -actin intensities were plotted. Means  $\pm$  SD of three independent experiments are shown. (D) Growth curves and colony formation assays of SGC7901 cells transfected with RELA or FOS vectors containing wild-type or mutant 3'-UTR and then treated with miR-7 mimic (miR-7)-transfected and miRNA mimic negative control (miR ctrl)-transfected BGC823 cells. Means  $\pm$  SD of a representative experiment ( $n = 3$ ) performed in triplicates are shown. \*,  $P < 0.05$ ; \*\*,  $P < 0.01$ ; N.S., not significant ( $P > 0.05$ ).

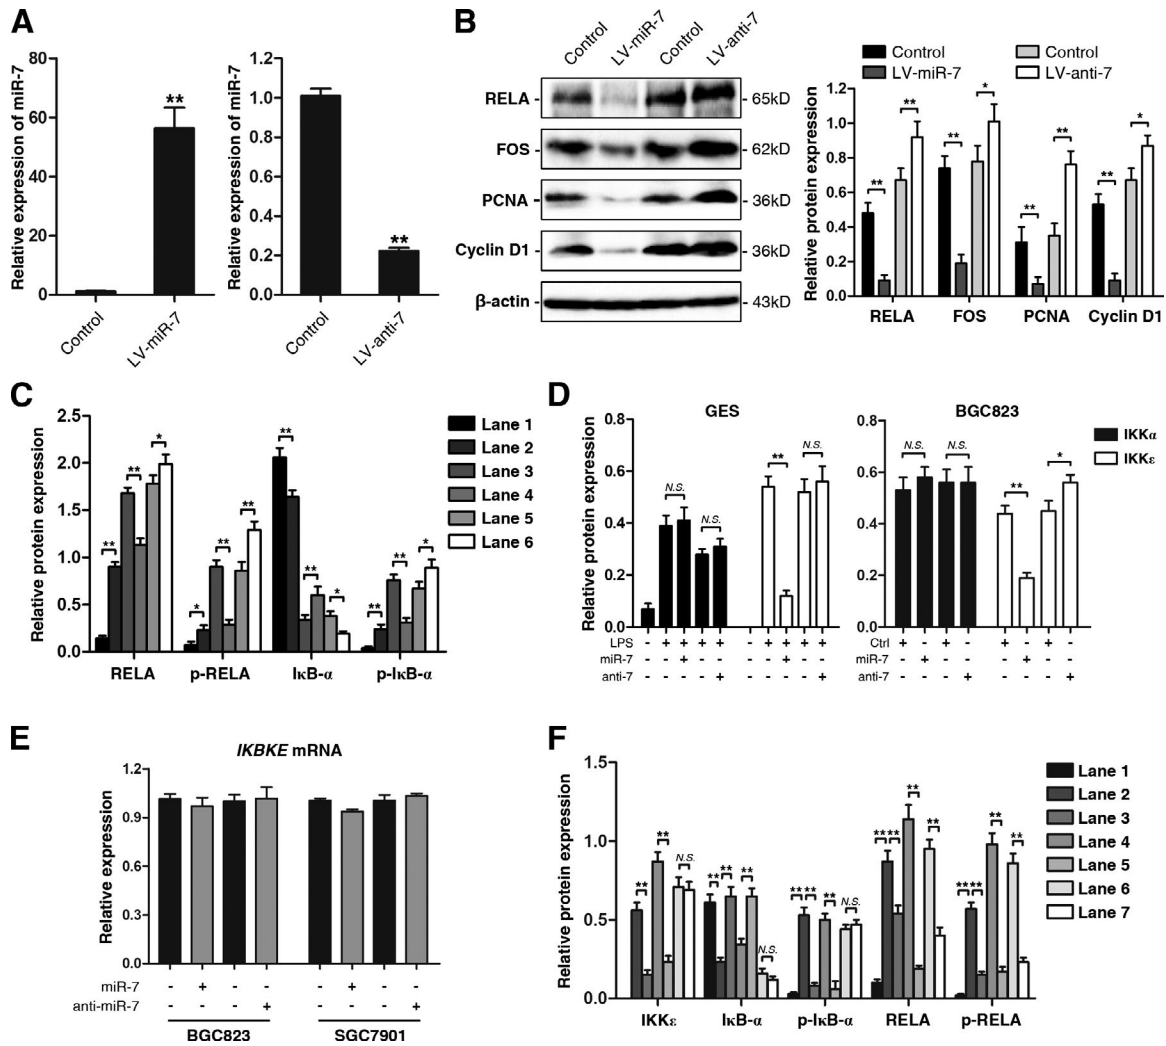

Figure S4. **miR-7 inhibits GC cell growth in vivo and regulates RELA activation by modulating IKK $\epsilon$ .** (A) Real-time PCR analysis of miR-7 expression in BGC823 cells after infection with the indicated lentiviral vectors. Means  $\pm$  SD (error bars) of three experiments performed in triplicates are shown. (B, left) The levels of RELA, FOS, PCNA, and cyclin D1 in the xenograft tumors were analyzed by Western blot. (right) The ratios of the protein/ $\beta$ -actin intensities were plotted. Means  $\pm$  SD of three independent experiments are shown. (C and D) The densitometric analysis of Western blot bands and the ratios of the protein/ $\beta$ -actin intensities were plotted for Fig. 6 A (C) and Fig. 6 C (D). Means  $\pm$  SD of three independent experiments are shown. (E) *IKBKE* mRNA expression in BGC823 and SGC7901 cells with the indicated transfection. Means  $\pm$  SD of three experiments performed in triplicates are shown. (F) The densitometric analysis of Western blot bands and the ratios of the protein/ $\beta$ -actin intensities were plotted for Fig. 6 E. \*,  $P < 0.05$ ; \*\*,  $P < 0.01$ ; N.S., not significant ( $P > 0.05$ ).

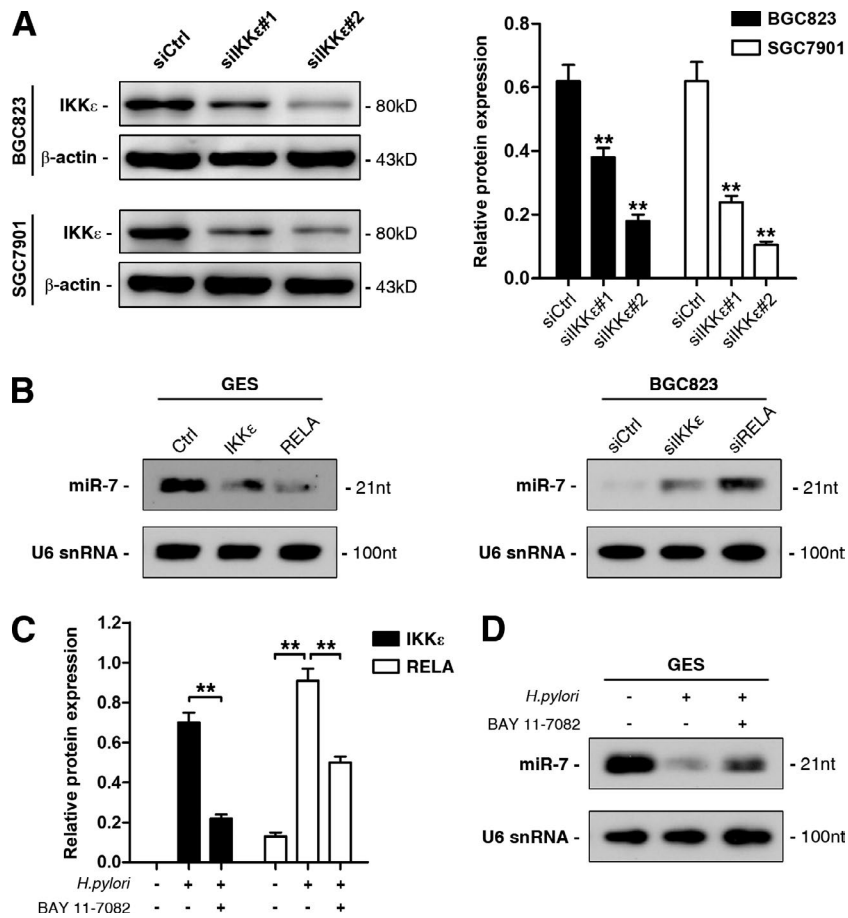

Figure S5. **The knockdown effects of IKK $\epsilon$  siRNAs on the protein levels of IKK $\epsilon$  in GC cells and the expression of mature miR-7 after modulating IKK $\epsilon$  and RELA expression.** (A, left) Transfection of IKK $\epsilon$  siRNAs significantly decreased IKK $\epsilon$  protein levels in BGC823 and SGC7901 cells. (right) The ratios of IKK $\epsilon$ / $\beta$ -actin intensities were plotted. Means  $\pm$  SD (error bars) of three independent experiments are shown. (B) Northern blot analysis of mature miR-7 levels in the indicated cells after the overexpression or silencing of IKK $\epsilon$  and RELA. (C) The densitometric analysis of Western blot bands for Fig. 7 E. The ratios of the protein/ $\beta$ -actin intensities were plotted. Means  $\pm$  SD of three independent experiments are shown. (D) Northern blot analysis of mature miR-7 levels after *H. pylori* infection or together with BAY 11-7082 pretreatment in GES cells. \*\*,  $P < 0.01$ .

Table S1. Transcripts down-regulated by miR-7 overexpression in BGC823 cells

| Gene symbol  | Replicate 1 Log <sub>2</sub> RNA ratio | Replicate 2 Log <sub>2</sub> RNA ratio | Mean RNA fold change |
|--------------|----------------------------------------|----------------------------------------|----------------------|
| REG4         | -5.03                                  | -4.88                                  | -4.95                |
| DMBT1        | -4.33                                  | -4.53                                  | -4.43                |
| REG1A        | -3.73                                  | -4.04                                  | -3.89                |
| CDKN1C       | -3.69                                  | -3.82                                  | -3.75                |
| LGALS4       | -3.45                                  | -3.42                                  | -3.44                |
| CLRN3        | -3.33                                  | -3.32                                  | -3.32                |
| DACT1        | -3.09                                  | -3.08                                  | -3.08                |
| PRSS35       | -3.07                                  | -3.01                                  | -3.04                |
| FOS          | -3.63                                  | -2.39                                  | -3.01                |
| MYH13        | -3.03                                  | -2.91                                  | -2.97                |
| MYH1         | -3.41                                  | -2.50                                  | -2.96                |
| FAM151A      | -2.73                                  | -2.71                                  | -2.72                |
| C11orf86     | -2.37                                  | -3.05                                  | -2.71                |
| CYP2B7P1     | -2.57                                  | -2.81                                  | -2.69                |
| PLA2G2A      | -2.64                                  | -2.72                                  | -2.68                |
| CEACAM6      | -2.59                                  | -2.67                                  | -2.63                |
| CXCR7        | -2.57                                  | -2.68                                  | -2.63                |
| CNDP1        | -2.35                                  | -2.86                                  | -2.60                |
| CYP2B6       | -2.57                                  | -2.49                                  | -2.53                |
| LOC100128893 | -3.43                                  | -1.55                                  | -2.49                |
| MMP9         | -2.52                                  | -2.44                                  | -2.48                |
| CDH17        | -2.54                                  | -2.38                                  | -2.46                |
| HEPH         | -2.65                                  | -2.23                                  | -2.44                |
| ABCG2        | -2.67                                  | -2.13                                  | -2.40                |
| NRAP         | -2.09                                  | -2.70                                  | -2.40                |
| CLEC3B       | -2.27                                  | -2.48                                  | -2.37                |
| KLK1         | -2.44                                  | -2.29                                  | -2.36                |
| S100A9       | -1.90                                  | -2.80                                  | -2.35                |
| REG1B        | -2.43                                  | -2.22                                  | -2.33                |
| MYH8         | -2.17                                  | -2.47                                  | -2.32                |
| SLPI         | -2.30                                  | -2.24                                  | -2.27                |
| SNCAIP       | -2.30                                  | -2.24                                  | -2.27                |
| PDZRN3       | -2.45                                  | -1.85                                  | -2.15                |
| RELA         | -1.94                                  | -2.27                                  | -2.10                |
| DNAH8        | -2.30                                  | -1.88                                  | -2.09                |
| SYTL2        | -2.12                                  | -1.99                                  | -2.06                |
| UST          | -2.11                                  | -1.98                                  | -2.04                |
| HSD3B1       | -2.02                                  | -2.04                                  | -2.03                |
| SPTA1        | -2.07                                  | -2.00                                  | -2.03                |
| RELN         | -2.23                                  | -1.83                                  | -2.03                |
| MCHR2        | -1.59                                  | -2.44                                  | -2.01                |
| F5           | -2.53                                  | -1.48                                  | -2.00                |
| TDGF1        | -1.35                                  | -2.63                                  | -1.99                |
| AK4          | -1.97                                  | -1.97                                  | -1.97                |
| APOD         | -1.72                                  | -2.14                                  | -1.93                |
| KCNJ2        | -1.83                                  | -2.03                                  | -1.93                |
| LYZ          | -1.81                                  | -2.03                                  | -1.92                |
| REG3A        | -1.73                                  | -2.06                                  | -1.90                |
| ACSL6        | -2.03                                  | -1.74                                  | -1.89                |
| C19orf77     | -2.02                                  | -1.73                                  | -1.88                |
| CCND1        | -1.99                                  | -1.69                                  | -1.84                |
| POLE4        | -1.80                                  | -1.87                                  | -1.83                |
| BDKRB1       | -1.93                                  | -1.68                                  | -1.81                |
| BDKRB2       | -1.82                                  | -1.78                                  | -1.80                |
| C6orf223     | -1.31                                  | -2.28                                  | -1.80                |
| PRICKLE1     | -1.41                                  | -2.18                                  | -1.79                |
| ALPI         | -1.81                                  | -1.75                                  | -1.78                |
| ST6GALNAC3   | -1.76                                  | -1.77                                  | -1.77                |
| LINC00312    | -2.48                                  | -1.05                                  | -1.76                |
| KCNK10       | -2.11                                  | -1.42                                  | -1.76                |
| MYOM1        | -1.65                                  | -1.84                                  | -1.74                |

Table S1. Transcripts down-regulated by miR-7 overexpression in BGC823 cells (Continued)

| Gene symbol  | Replicate 1 Log <sub>2</sub> RNA ratio | Replicate 2 Log <sub>2</sub> RNA ratio | Mean RNA fold change |
|--------------|----------------------------------------|----------------------------------------|----------------------|
| GRK5         | -1.75                                  | -1.72                                  | -1.73                |
| GRAMD1B      | -2.21                                  | -1.24                                  | -1.72                |
| SEMA3F       | -1.69                                  | -1.73                                  | -1.71                |
| SLC12A2      | -1.72                                  | -1.65                                  | -1.68                |
| VTN          | -1.73                                  | -1.62                                  | -1.68                |
| FGFBP1       | -1.65                                  | -1.70                                  | -1.68                |
| PGM1         | -1.66                                  | -1.69                                  | -1.67                |
| DES          | -1.80                                  | -1.54                                  | -1.67                |
| F10          | -1.58                                  | -1.75                                  | -1.67                |
| RASL11A      | -1.69                                  | -1.64                                  | -1.66                |
| WDFY4        | -1.50                                  | -1.80                                  | -1.65                |
| CTSE         | -1.74                                  | -1.56                                  | -1.65                |
| AIF1         | -1.60                                  | -1.67                                  | -1.64                |
| PIK3R3       | -1.44                                  | -1.83                                  | -1.63                |
| SPINK1       | -1.85                                  | -1.41                                  | -1.63                |
| ZNF169       | -1.70                                  | -1.52                                  | -1.61                |
| GPA33        | -1.49                                  | -1.71                                  | -1.60                |
| HS3ST1       | -1.46                                  | -1.72                                  | -1.59                |
| YY1          | -1.68                                  | -1.47                                  | -1.58                |
| DAPK2        | -1.65                                  | -1.50                                  | -1.57                |
| SYNE1        | -1.60                                  | -1.54                                  | -1.57                |
| PLA2G2E      | -1.25                                  | -1.86                                  | -1.56                |
| HR           | -1.82                                  | -1.27                                  | -1.54                |
| C10orf116    | -1.63                                  | -1.45                                  | -1.54                |
| VIPR1        | -1.66                                  | -1.39                                  | -1.52                |
| LGR5         | -1.62                                  | -1.42                                  | -1.52                |
| CDHR5        | -1.61                                  | -1.43                                  | -1.52                |
| CREG2        | -1.61                                  | -1.42                                  | -1.52                |
| VRTN         | -1.37                                  | -1.66                                  | -1.51                |
| PIP5K1B      | -1.53                                  | -1.46                                  | -1.49                |
| FAM124B      | -1.48                                  | -1.50                                  | -1.49                |
| KLF2         | -1.54                                  | -1.43                                  | -1.49                |
| PDGFRA       | -1.46                                  | -1.49                                  | -1.48                |
| CCRL2        | -1.47                                  | -1.48                                  | -1.47                |
| LOC100505633 | -1.35                                  | -1.59                                  | -1.47                |
| PDZK1IP1     | -1.55                                  | -1.39                                  | -1.47                |
| ATP1B1       | -1.41                                  | -1.53                                  | -1.47                |
| SLC5A1       | -1.56                                  | -1.37                                  | -1.46                |
| DNAH2        | -1.48                                  | -1.45                                  | -1.46                |
| LIPG         | -1.41                                  | -1.50                                  | -1.46                |
| SEMA3B       | -1.51                                  | -1.38                                  | -1.45                |
| CCND2        | -1.52                                  | -1.37                                  | -1.44                |
| ANXA1        | -1.54                                  | -1.35                                  | -1.44                |
| IL1B         | -1.59                                  | -1.30                                  | -1.44                |
| FAM113B      | -1.76                                  | -1.12                                  | -1.44                |
| SULT2A1      | -1.27                                  | -1.60                                  | -1.43                |
| TM4SF5       | -1.38                                  | -1.49                                  | -1.43                |
| MUC13        | -1.48                                  | -1.38                                  | -1.43                |
| MAN1C1       | -1.44                                  | -1.42                                  | -1.43                |
| FCAMR        | -1.48                                  | -1.37                                  | -1.43                |
| HOXA7        | -1.17                                  | -1.68                                  | -1.42                |
| VSIG2        | -1.58                                  | -1.27                                  | -1.42                |
| CEACAM7      | -1.55                                  | -1.29                                  | -1.42                |
| ITLN1        | -1.73                                  | -1.10                                  | -1.41                |
| MYO15B       | -1.60                                  | -1.20                                  | -1.40                |
| FCGR2A       | -1.72                                  | -1.06                                  | -1.39                |
| RNF186       | -1.05                                  | -1.73                                  | -1.39                |
| BCL2L1       | -1.40                                  | -1.37                                  | -1.39                |
| CHRNA7       | -1.38                                  | -1.39                                  | -1.38                |
| TFF1         | -1.71                                  | -1.02                                  | -1.37                |
| FGB          | -1.09                                  | -1.63                                  | -1.36                |

Table S1. Transcripts down-regulated by miR-7 overexpression in BGC823 cells (Continued)

| Gene symbol  | Replicate 1 Log <sub>2</sub> RNA ratio | Replicate 2 Log <sub>2</sub> RNA ratio | Mean RNA fold change |
|--------------|----------------------------------------|----------------------------------------|----------------------|
| DEFB1        | -1.58                                  | -1.14                                  | -1.36                |
| ST6GALNAC1   | -1.54                                  | -1.17                                  | -1.35                |
| LOC145837    | -1.51                                  | -1.19                                  | -1.35                |
| RGN          | -1.30                                  | -1.40                                  | -1.35                |
| EFNB2        | -1.31                                  | -1.34                                  | -1.33                |
| KRT6B        | -1.35                                  | -1.30                                  | -1.32                |
| KLK10        | -1.37                                  | -1.25                                  | -1.31                |
| SLCO2A1      | -1.14                                  | -1.48                                  | -1.31                |
| GPR162       | -1.23                                  | -1.38                                  | -1.31                |
| KIF26B       | -1.31                                  | -1.30                                  | -1.31                |
| MGAT3        | -1.27                                  | -1.33                                  | -1.30                |
| HOTTIP       | -1.04                                  | -1.53                                  | -1.29                |
| CALML4       | -1.23                                  | -1.32                                  | -1.28                |
| TBX4         | -1.32                                  | -1.22                                  | -1.27                |
| APOA2        | -1.26                                  | -1.28                                  | -1.27                |
| CYP2F1       | -1.26                                  | -1.27                                  | -1.27                |
| SAMD11       | -1.49                                  | -1.04                                  | -1.26                |
| H19          | -1.23                                  | -1.29                                  | -1.26                |
| SLC39A10     | -1.14                                  | -1.36                                  | -1.25                |
| MIRLET7BHG   | -1.33                                  | -1.16                                  | -1.25                |
| ASGR2        | -1.37                                  | -1.12                                  | -1.24                |
| EGFR         | -1.18                                  | -1.28                                  | -1.23                |
| IGF1         | -1.23                                  | -1.22                                  | -1.23                |
| NEURL3       | -1.19                                  | -1.27                                  | -1.23                |
| PAQR8        | -1.20                                  | -1.25                                  | -1.22                |
| MPP1         | -1.39                                  | -1.05                                  | -1.22                |
| FZD9         | -1.30                                  | -1.14                                  | -1.22                |
| SH3TC1       | -1.09                                  | -1.36                                  | -1.22                |
| IL17RE       | -1.41                                  | -1.02                                  | -1.21                |
| CDX2         | -1.42                                  | -1.00                                  | -1.21                |
| LOC100507039 | -1.32                                  | -1.08                                  | -1.20                |
| TJP3         | -1.19                                  | -1.21                                  | -1.20                |
| FLRT3        | -1.31                                  | -1.08                                  | -1.20                |
| AMICA1       | -1.13                                  | -1.26                                  | -1.19                |
| THRA         | -1.21                                  | -1.17                                  | -1.19                |
| FAM109A      | -1.19                                  | -1.15                                  | -1.17                |
| MBIP         | -1.16                                  | -1.18                                  | -1.17                |
| ATP8A1       | -1.29                                  | -1.05                                  | -1.17                |
| SLC39A4      | -1.03                                  | -1.30                                  | -1.17                |
| LYPD6B       | -1.10                                  | -1.20                                  | -1.15                |
| C9orf150     | -1.08                                  | -1.18                                  | -1.13                |
| ACSM3        | -1.12                                  | -1.13                                  | -1.12                |
| SELENBP1     | -1.08                                  | -1.16                                  | -1.12                |
| BAIAP3       | -1.01                                  | -1.22                                  | -1.12                |
| SARM1        | -1.06                                  | -1.17                                  | -1.11                |
| PCSK9        | -1.08                                  | -1.14                                  | -1.11                |
| PIWIL2       | -1.11                                  | -1.09                                  | -1.10                |
| MGC4294      | -1.10                                  | -1.06                                  | -1.08                |
| IGF2BP2      | -1.06                                  | -1.10                                  | -1.08                |
| GALC         | -1.06                                  | -1.08                                  | -1.07                |
| OAT          | -1.02                                  | -1.11                                  | -1.07                |
| CASP4        | -1.12                                  | -1.01                                  | -1.06                |
| CYP17A1      | -1.09                                  | -1.03                                  | -1.06                |
| TMC5         | -1.00                                  | -1.10                                  | -1.05                |
| ODAM         | -1.05                                  | -1.04                                  | -1.04                |
| HYAL1        | -1.02                                  | -1.06                                  | -1.04                |
| AMIGO2       | -1.03                                  | -1.05                                  | -1.04                |
| TSPAN8       | -1.01                                  | -1.05                                  | -1.03                |

Table S2. Proteins down-regulated by miR-7 overexpression in BGC823 cells

| Gene symbol | Replicate 1 Log <sub>2</sub> protein ratio | Replicate 2 Log <sub>2</sub> protein ratio | Mean protein fold change |
|-------------|--------------------------------------------|--------------------------------------------|--------------------------|
| CTSE        | -2.73                                      | -2.64                                      | -2.69                    |
| TDGF1       | -2.40                                      | -2.28                                      | -2.34                    |
| N4BP2L2     | -2.26                                      | -2.22                                      | -2.24                    |
| MUC13       | -2.06                                      | -2.02                                      | -2.04                    |
| PLA2G2E     | -2.01                                      | -1.93                                      | -1.97                    |
| ZNF169      | -1.96                                      | -1.89                                      | -1.92                    |
| SELENBP1    | -1.89                                      | -1.93                                      | -1.91                    |
| CLEC3B      | -1.82                                      | -1.84                                      | -1.83                    |
| SIN3B       | -1.85                                      | -1.80                                      | -1.83                    |
| MAN1C1      | -1.80                                      | -1.83                                      | -1.81                    |
| MLLT1       | -1.77                                      | -1.79                                      | -1.78                    |
| MAP3K8      | -1.74                                      | -1.78                                      | -1.76                    |
| PIWIL2      | -1.75                                      | -1.73                                      | -1.74                    |
| TACC2       | -1.73                                      | -1.70                                      | -1.72                    |
| IGF1        | -1.71                                      | -1.71                                      | -1.71                    |
| IGF2BP2     | -1.69                                      | -1.71                                      | -1.70                    |
| SLC12A4     | -1.67                                      | -1.68                                      | -1.68                    |
| SLC39A4     | -1.64                                      | -1.66                                      | -1.65                    |
| DES         | -1.66                                      | -1.63                                      | -1.65                    |
| CDC45       | -1.61                                      | -1.63                                      | -1.62                    |
| SLC5A1      | -1.60                                      | -1.61                                      | -1.61                    |
| BCL2L1      | -1.60                                      | -1.58                                      | -1.59                    |
| C16orf71    | -1.58                                      | -1.59                                      | -1.59                    |
| EGFR        | -1.58                                      | -1.57                                      | -1.57                    |
| SLPI        | -1.57                                      | -1.58                                      | -1.57                    |
| F10         | -1.56                                      | -1.55                                      | -1.56                    |
| IGHMBP2     | -1.55                                      | -1.53                                      | -1.54                    |
| PEX1        | -1.52                                      | -1.56                                      | -1.54                    |
| IL17RE      | -1.53                                      | -1.54                                      | -1.54                    |
| CEACAM7     | -1.53                                      | -1.55                                      | -1.54                    |
| DDX19B      | -1.48                                      | -1.52                                      | -1.50                    |
| IGF1R       | -1.51                                      | -1.47                                      | -1.49                    |
| ANXA1       | -1.46                                      | -1.50                                      | -1.48                    |
| EXD2        | -1.42                                      | -1.48                                      | -1.45                    |
| CASP4       | -1.40                                      | -1.47                                      | -1.44                    |
| KCNJ2       | -1.45                                      | -1.39                                      | -1.42                    |
| USP1        | -1.38                                      | -1.39                                      | -1.39                    |
| S100A9      | -1.36                                      | -1.39                                      | -1.38                    |
| MYH8        | -1.35                                      | -1.38                                      | -1.37                    |
| NAGLU       | -1.36                                      | -1.37                                      | -1.36                    |
| AK4         | -1.35                                      | -1.37                                      | -1.36                    |
| KDM4B       | -1.32                                      | -1.33                                      | -1.33                    |
| SYTL2       | -1.31                                      | -1.34                                      | -1.33                    |
| IFT140      | -1.30                                      | -1.35                                      | -1.32                    |
| CDX2        | -1.31                                      | -1.33                                      | -1.32                    |
| RELA        | -1.34                                      | -1.31                                      | -1.32                    |
| VTN         | -1.32                                      | -1.31                                      | -1.32                    |
| FAM124B     | -1.28                                      | -1.35                                      | -1.32                    |
| C1D         | -1.34                                      | -1.29                                      | -1.31                    |
| YY1         | -1.30                                      | -1.31                                      | -1.30                    |
| DNAH8       | -1.28                                      | -1.32                                      | -1.30                    |
| MNX1        | -1.29                                      | -1.30                                      | -1.29                    |
| GON4L       | -1.28                                      | -1.30                                      | -1.29                    |
| CCRL2       | -1.31                                      | -1.27                                      | -1.29                    |
| DUS1L       | -1.27                                      | -1.28                                      | -1.27                    |
| PANK4       | -1.26                                      | -1.28                                      | -1.27                    |
| IKBKE       | -1.25                                      | -1.28                                      | -1.27                    |
| C4orf27     | -1.29                                      | -1.24                                      | -1.27                    |
| PRC1        | -1.27                                      | -1.26                                      | -1.26                    |
| ACAP2       | -1.26                                      | -1.27                                      | -1.26                    |
| C1orf131    | -1.23                                      | -1.29                                      | -1.26                    |



Table S2. Proteins down-regulated by miR-7 overexpression in BGC823 cells (Continued)

| Gene symbol | Replicate 1 Log <sub>2</sub> protein ratio | Replicate 2 Log <sub>2</sub> protein ratio | Mean protein fold change |
|-------------|--------------------------------------------|--------------------------------------------|--------------------------|
| MBIP        | -1.25                                      | -1.26                                      | -1.26                    |
| GRAMD1B     | -1.26                                      | -1.25                                      | -1.26                    |
| KRT9        | -1.27                                      | -1.24                                      | -1.26                    |
| MORC3       | -1.23                                      | -1.24                                      | -1.24                    |
| PIK3R3      | -1.24                                      | -1.23                                      | -1.24                    |
| ZNF431      | -1.24                                      | -1.22                                      | -1.23                    |
| CDH17       | -1.20                                      | -1.25                                      | -1.23                    |
| FLRT3       | -1.20                                      | -1.24                                      | -1.22                    |
| KRT10       | -0.80                                      | -1.20                                      | -1.00                    |
| DDX51       | -0.77                                      | -0.79                                      | -0.78                    |
| FAM134A     | -0.73                                      | -0.79                                      | -0.76                    |
| SCAF8       | -0.70                                      | -0.77                                      | -0.73                    |
| PANK1       | -0.68                                      | -0.71                                      | -0.69                    |
| ATP11A      | -0.63                                      | -0.70                                      | -0.67                    |

Table S3. 39 genes reduced at protein and RNA levels by miR-7 overexpression

| Gene symbol | Mean protein fold change (log <sub>2</sub> ) | Mean RNA fold change (log <sub>2</sub> ) | Prediction algorithms                                               |
|-------------|----------------------------------------------|------------------------------------------|---------------------------------------------------------------------|
| CTSE        | -2.69                                        | -1.65                                    | -                                                                   |
| TDGF1       | -2.34                                        | -1.99                                    | -                                                                   |
| MUC13       | -2.04                                        | -1.43                                    | TargetScan <sup>a</sup> (1) <sup>b</sup> , miRanda <sup>c</sup> (2) |
| SELENBP1    | -1.91                                        | -1.12                                    | -                                                                   |
| CLEC3B      | -1.83                                        | -2.37                                    | -                                                                   |
| MAN1C1      | -1.81                                        | -1.43                                    | -                                                                   |
| PIWIL2      | -1.74                                        | -1.10                                    | -                                                                   |
| IGF1        | -1.71                                        | -1.23                                    | -                                                                   |
| IGF2BP2     | -1.70                                        | -1.08                                    | TargetScan (1), miRanda (1)                                         |
| SLC39A4     | -1.65                                        | -1.17                                    | -                                                                   |
| DES         | -1.65                                        | -1.67                                    | TargetScan (1), miRanda (1)                                         |
| ZNF169      | -1.61                                        | -1.92                                    | miRanda (1)                                                         |
| SLC5A1      | -1.61                                        | -1.46                                    | TargetScan (1), miRanda (1)                                         |
| BCL2L1      | -1.59                                        | -1.39                                    | TargetScan (1), miRanda (2)                                         |
| EGFR        | -1.57                                        | -1.23                                    | TargetScan (3), miRanda (4)                                         |
| SLPI        | -1.57                                        | -2.27                                    | -                                                                   |
| F10         | -1.56                                        | -1.67                                    | -                                                                   |
| PLA2G2E     | -1.56                                        | -1.97                                    | -                                                                   |
| IL17RE      | -1.54                                        | -1.21                                    | TargetScan (1), miRanda (2)                                         |
| CEACAM7     | -1.54                                        | -1.42                                    | miRanda (1)                                                         |
| ANXA1       | -1.48                                        | -1.44                                    | -                                                                   |
| CASP4       | -1.44                                        | -1.06                                    | -                                                                   |
| KCNJ2       | -1.42                                        | -1.93                                    | TargetScan (1), miRanda (1), PicTar <sup>d</sup> (1)                |
| S100A9      | -1.38                                        | -2.35                                    | miRanda (1)                                                         |
| MYH8        | -1.37                                        | -2.32                                    | -                                                                   |
| AK4         | -1.36                                        | -2.10                                    | -                                                                   |
| SYTL2       | -1.33                                        | -2.06                                    | -                                                                   |
| CDX2        | -1.32                                        | -1.21                                    | miRanda (2)                                                         |
| RELA        | -1.32                                        | -2.10                                    | TargetScan (2), miRanda (2)                                         |
| VTN         | -1.32                                        | -1.68                                    | -                                                                   |
| FAM124B     | -1.32                                        | -1.49                                    | miRanda (3)                                                         |
| YY1         | -1.30                                        | -1.58                                    | TargetScan (1), miRanda (1)                                         |
| DNAH8       | -1.30                                        | -2.09                                    | -                                                                   |
| CCRL2       | -1.29                                        | -1.47                                    | -                                                                   |
| MBIP        | -1.26                                        | -1.17                                    | -                                                                   |
| GRAMD1B     | -1.26                                        | -1.72                                    | -                                                                   |
| PIK3R3      | -1.24                                        | -1.63                                    | TargetScan (1), miRanda (4)                                         |
| CDH17       | -1.23                                        | -2.46                                    | -                                                                   |
| FLRT3       | -1.22                                        | -1.20                                    | -                                                                   |

<sup>a</sup>Grimson et al., 2007.

<sup>b</sup>The number of putative miR-7 binding sites predicted by the indicated algorithm is shown in parentheses.

<sup>c</sup>John et al., 2004.

<sup>d</sup>Krek et al., 2005.

Table S4. Transcripts up-regulated by miR-7 overexpression in BGC823 cells

| Gene symbol  | Replicate 1 Log <sub>2</sub> RNA ratio | Replicate 2 Log <sub>2</sub> RNA ratio | Mean RNA fold change |
|--------------|----------------------------------------|----------------------------------------|----------------------|
| MT1B         | 2.40                                   | 4.45                                   | 3.43                 |
| CST7         | 3.89                                   | 2.92                                   | 3.40                 |
| UBD          | 3.02                                   | 3.38                                   | 3.20                 |
| VTCN1        | 3.12                                   | 3.16                                   | 3.14                 |
| FST          | 2.77                                   | 3.36                                   | 3.06                 |
| LOC643401    | 2.58                                   | 3.46                                   | 3.02                 |
| ANGPT2       | 3.02                                   | 2.72                                   | 2.87                 |
| TPO          | 2.31                                   | 3.41                                   | 2.86                 |
| TXNRD3       | 3.02                                   | 2.69                                   | 2.86                 |
| TRPC3        | 2.83                                   | 2.88                                   | 2.86                 |
| CCL4         | 2.77                                   | 2.90                                   | 2.84                 |
| NPPB         | 3.29                                   | 2.15                                   | 2.72                 |
| VCX          | 2.60                                   | 2.71                                   | 2.66                 |
| MATN2        | 2.08                                   | 3.17                                   | 2.63                 |
| VCX3A        | 2.60                                   | 2.65                                   | 2.62                 |
| TTYH1        | 2.70                                   | 2.51                                   | 2.60                 |
| C2orf54      | 2.72                                   | 2.46                                   | 2.59                 |
| VCX2         | 2.60                                   | 2.55                                   | 2.57                 |
| CST6         | 1.88                                   | 3.25                                   | 2.57                 |
| MT1H         | 2.52                                   | 2.58                                   | 2.55                 |
| MT1L         | 2.57                                   | 2.52                                   | 2.55                 |
| MT1G         | 2.47                                   | 2.58                                   | 2.52                 |
| MT1E         | 2.28                                   | 2.70                                   | 2.49                 |
| ALPP         | 2.57                                   | 2.40                                   | 2.49                 |
| C6orf15      | 2.45                                   | 2.52                                   | 2.49                 |
| MT1X         | 2.38                                   | 2.55                                   | 2.46                 |
| LYG2         | 1.78                                   | 3.12                                   | 2.45                 |
| NCF2         | 2.46                                   | 2.40                                   | 2.43                 |
| FLJ26850     | 2.39                                   | 2.46                                   | 2.42                 |
| HTRA3        | 2.34                                   | 2.46                                   | 2.40                 |
| DEFB103B     | 2.39                                   | 2.41                                   | 2.40                 |
| CCL3         | 2.57                                   | 2.21                                   | 2.39                 |
| FGF9         | 2.43                                   | 2.32                                   | 2.38                 |
| HBG1         | 1.40                                   | 3.34                                   | 2.37                 |
| LOC100131138 | 2.58                                   | 2.16                                   | 2.37                 |
| ANKRD1       | 2.50                                   | 2.24                                   | 2.37                 |
| MT2A         | 2.28                                   | 2.40                                   | 2.34                 |
| LOC100506689 | 2.19                                   | 2.37                                   | 2.28                 |
| KRTAP3-1     | 2.24                                   | 2.28                                   | 2.26                 |
| MT1F         | 2.17                                   | 2.24                                   | 2.21                 |
| RSAD2        | 2.12                                   | 2.20                                   | 2.16                 |
| FHOD3        | 2.06                                   | 2.25                                   | 2.16                 |
| MT1A         | 2.14                                   | 2.09                                   | 2.12                 |
| ME1          | 2.43                                   | 1.62                                   | 2.02                 |
| CCL3L3       | 2.38                                   | 1.61                                   | 2.00                 |
| PAEP         | 1.66                                   | 2.33                                   | 2.00                 |
| LOC730755    | 2.29                                   | 1.69                                   | 1.99                 |
| GPR110       | 1.91                                   | 2.02                                   | 1.97                 |
| VCY          | 2.18                                   | 1.71                                   | 1.94                 |
| TNNT2        | 2.01                                   | 1.87                                   | 1.94                 |
| SIGLEC6      | 2.03                                   | 1.86                                   | 1.94                 |
| GZMB         | 2.19                                   | 1.60                                   | 1.89                 |
| ZBED2        | 2.02                                   | 1.76                                   | 1.89                 |
| COX7B2       | 1.81                                   | 1.94                                   | 1.87                 |
| SPANXD       | 1.97                                   | 1.77                                   | 1.87                 |
| MIA          | 1.85                                   | 1.88                                   | 1.87                 |
| PLAC1        | 1.99                                   | 1.73                                   | 1.86                 |
| RNF128       | 1.63                                   | 1.94                                   | 1.79                 |
| SPANXB2      | 2.16                                   | 1.36                                   | 1.76                 |
| KSR1         | 1.74                                   | 1.78                                   | 1.76                 |
| MAGEC1       | 1.55                                   | 1.96                                   | 1.76                 |

Table S4. Transcripts up-regulated by miR-7 overexpression in BGC823 cells (Continued)

| Gene symbol  | Replicate 1 Log <sub>2</sub> RNA ratio | Replicate 2 Log <sub>2</sub> RNA ratio | Mean RNA fold change |
|--------------|----------------------------------------|----------------------------------------|----------------------|
| SPANXA1      | 1.72                                   | 1.79                                   | 1.76                 |
| CXorf51A     | 1.61                                   | 1.82                                   | 1.71                 |
| ZNF114       | 1.60                                   | 1.77                                   | 1.68                 |
| ASAP1-IT1    | 1.39                                   | 1.97                                   | 1.68                 |
| ULBP2        | 1.54                                   | 1.81                                   | 1.67                 |
| LOC728485    | 1.44                                   | 1.87                                   | 1.65                 |
| SLC2A3       | 1.69                                   | 1.50                                   | 1.60                 |
| KRT34        | 1.33                                   | 1.85                                   | 1.59                 |
| SUSD2        | 1.55                                   | 1.58                                   | 1.57                 |
| XG           | 1.51                                   | 1.55                                   | 1.53                 |
| RGL1         | 1.67                                   | 1.38                                   | 1.52                 |
| C16orf73     | 1.17                                   | 1.88                                   | 1.52                 |
| VGLL1        | 1.60                                   | 1.44                                   | 1.52                 |
| KRT7         | 1.72                                   | 1.31                                   | 1.51                 |
| PRKCH        | 1.59                                   | 1.44                                   | 1.51                 |
| CRIP2        | 1.24                                   | 1.77                                   | 1.51                 |
| LOC100506262 | 1.96                                   | 1.04                                   | 1.50                 |
| SCHIP1       | 1.49                                   | 1.50                                   | 1.49                 |
| HLA-DQB1     | 1.34                                   | 1.62                                   | 1.48                 |
| GLI2         | 1.07                                   | 1.82                                   | 1.44                 |
| LY6K         | 1.29                                   | 1.59                                   | 1.44                 |
| CCND3        | 1.47                                   | 1.40                                   | 1.43                 |
| MYH7B        | 1.44                                   | 1.39                                   | 1.42                 |
| MAP1B        | 1.41                                   | 1.42                                   | 1.41                 |
| CT45A1       | 1.35                                   | 1.48                                   | 1.41                 |
| CRYAB        | 1.42                                   | 1.38                                   | 1.40                 |
| SLC2A12      | 1.02                                   | 1.75                                   | 1.39                 |
| AGP1         | 1.51                                   | 1.26                                   | 1.39                 |
| AGPAT9       | 1.40                                   | 1.36                                   | 1.38                 |
| ABAT         | 1.35                                   | 1.41                                   | 1.38                 |
| MYBL1        | 1.36                                   | 1.38                                   | 1.37                 |
| NBPF11       | 1.48                                   | 1.24                                   | 1.36                 |
| SLC2A14      | 1.31                                   | 1.40                                   | 1.36                 |
| CYFIP2       | 1.27                                   | 1.44                                   | 1.35                 |
| KRT13        | 1.50                                   | 1.20                                   | 1.35                 |
| IFIT3        | 1.43                                   | 1.26                                   | 1.34                 |
| IL2RG        | 1.29                                   | 1.39                                   | 1.34                 |
| NBPF10       | 1.52                                   | 1.12                                   | 1.32                 |
| DDX60        | 1.39                                   | 1.25                                   | 1.32                 |
| SERPINF1     | 1.40                                   | 1.24                                   | 1.32                 |
| IFIT1        | 1.26                                   | 1.37                                   | 1.31                 |
| TAS2R10      | 1.52                                   | 1.10                                   | 1.31                 |
| PRF1         | 1.32                                   | 1.29                                   | 1.31                 |
| WWC2         | 1.51                                   | 1.08                                   | 1.29                 |
| LOC100507218 | 1.20                                   | 1.37                                   | 1.28                 |
| PADI1        | 1.17                                   | 1.35                                   | 1.26                 |
| C10orf114    | 1.34                                   | 1.19                                   | 1.26                 |
| GLS2         | 1.16                                   | 1.34                                   | 1.25                 |
| RGS9         | 1.39                                   | 1.10                                   | 1.25                 |
| COL13A1      | 1.27                                   | 1.21                                   | 1.24                 |
| CST1         | 1.37                                   | 1.12                                   | 1.24                 |
| IFI44        | 1.09                                   | 1.39                                   | 1.24                 |
| TKTL1        | 1.29                                   | 1.18                                   | 1.23                 |
| CST2         | 1.28                                   | 1.18                                   | 1.23                 |
| GADD45B      | 1.24                                   | 1.21                                   | 1.23                 |
| CCDC19       | 1.22                                   | 1.21                                   | 1.22                 |
| HEG1         | 1.18                                   | 1.19                                   | 1.18                 |
| ABHD6        | 1.30                                   | 1.07                                   | 1.18                 |
| ABCA1        | 1.20                                   | 1.15                                   | 1.18                 |
| PSG9         | 1.05                                   | 1.30                                   | 1.18                 |
| NR2F1        | 1.08                                   | 1.27                                   | 1.18                 |

Table S4. Transcripts up-regulated by miR-7 overexpression in BGC823 cells (Continued)

| Gene symbol   | Replicate 1 Log <sub>2</sub> RNA ratio | Replicate 2 Log <sub>2</sub> RNA ratio | Mean RNA fold change |
|---------------|----------------------------------------|----------------------------------------|----------------------|
| CSRP2         | 1.20                                   | 1.15                                   | 1.18                 |
| ADAMTS14      | 1.33                                   | 1.01                                   | 1.17                 |
| SYTL3         | 1.13                                   | 1.21                                   | 1.17                 |
| DKK1          | 1.22                                   | 1.11                                   | 1.17                 |
| C5orf46       | 1.29                                   | 1.04                                   | 1.16                 |
| TPM2          | 1.12                                   | 1.21                                   | 1.16                 |
| SLC16A6       | 1.11                                   | 1.22                                   | 1.16                 |
| CT45A5        | 1.01                                   | 1.32                                   | 1.16                 |
| KIF17         | 1.23                                   | 1.10                                   | 1.16                 |
| CNTNAP3       | 1.09                                   | 1.19                                   | 1.14                 |
| OASL          | 1.10                                   | 1.17                                   | 1.14                 |
| LOC84856      | 1.13                                   | 1.12                                   | 1.13                 |
| ATF3          | 1.09                                   | 1.15                                   | 1.12                 |
| RFPL1         | 1.05                                   | 1.19                                   | 1.12                 |
| SHANK2        | 1.12                                   | 1.12                                   | 1.12                 |
| DHX58         | 1.08                                   | 1.16                                   | 1.12                 |
| RTP4          | 1.20                                   | 1.02                                   | 1.11                 |
| MAP2K7        | 1.06                                   | 1.15                                   | 1.11                 |
| SLCO1B3       | 1.18                                   | 1.00                                   | 1.09                 |
| MSMB          | 1.10                                   | 1.08                                   | 1.09                 |
| ACTA2         | 1.02                                   | 1.16                                   | 1.09                 |
| IFIT2         | 1.01                                   | 1.17                                   | 1.09                 |
| SAMD4A        | 1.12                                   | 1.03                                   | 1.07                 |
| NEDD9         | 1.01                                   | 1.14                                   | 1.07                 |
| MAGEA1        | 1.13                                   | 1.01                                   | 1.07                 |
| DKFZP586B0319 | 1.10                                   | 1.02                                   | 1.06                 |
| OBFC2A        | 1.06                                   | 1.07                                   | 1.06                 |
| GAST          | 1.01                                   | 1.07                                   | 1.04                 |
| IFFO2         | 1.01                                   | 1.01                                   | 1.01                 |

Table S5. Proteins up-regulated by miR-7 overexpression in BGC823 cells

| Gene Symbol     | Replicate 1 Log <sub>2</sub> protein ratio | Replicate 2 Log <sub>2</sub> protein ratio | Mean protein fold change |
|-----------------|--------------------------------------------|--------------------------------------------|--------------------------|
| FAM111A         | 2.33                                       | 3.88                                       | 3.10                     |
| FAM103A1        | 2.24                                       | 2.92                                       | 2.58                     |
| CXCL12          | 2.14                                       | 2.78                                       | 2.46                     |
| STK17A          | 2.18                                       | 2.72                                       | 2.45                     |
| RPL32P3         | 2.01                                       | 2.84                                       | 2.42                     |
| LOC339352       | 2.01                                       | 2.77                                       | 2.39                     |
| METTL18         | 2.10                                       | 1.85                                       | 1.97                     |
| DCTN2           | 1.96                                       | 1.80                                       | 1.88                     |
| C7              | 2.06                                       | 1.45                                       | 1.75                     |
| MCM3AP          | 1.93                                       | 1.55                                       | 1.74                     |
| C12orf10        | 1.73                                       | 1.65                                       | 1.69                     |
| OR6K2           | 1.84                                       | 1.48                                       | 1.66                     |
| NAA25           | 1.78                                       | 1.50                                       | 1.64                     |
| ALPL            | 1.51                                       | 1.64                                       | 1.57                     |
| APOO            | 1.52                                       | 1.50                                       | 1.51                     |
| DDX11           | 1.40                                       | 1.62                                       | 1.51                     |
| LILRP2          | 1.45                                       | 1.50                                       | 1.47                     |
| SMN1            | 1.64                                       | 1.22                                       | 1.43                     |
| ZNF813          | 1.40                                       | 1.43                                       | 1.41                     |
| LOC729852       | 1.30                                       | 1.52                                       | 1.41                     |
| GPR115          | 1.56                                       | 1.24                                       | 1.40                     |
| TMEM8A          | 1.51                                       | 1.25                                       | 1.38                     |
| UTP11L          | 1.31                                       | 1.39                                       | 1.35                     |
| MAP2            | 1.37                                       | 1.25                                       | 1.31                     |
| BBS9            | 1.39                                       | 1.21                                       | 1.30                     |
| SNRPD1          | 1.41                                       | 1.18                                       | 1.29                     |
| AIFM2           | 1.33                                       | 1.25                                       | 1.29                     |
| LYZL1           | 1.27                                       | 1.29                                       | 1.28                     |
| SYNRG           | 1.21                                       | 1.31                                       | 1.26                     |
| PHOSPHO2-KLHL23 | 1.26                                       | 1.22                                       | 1.24                     |
| RRP1            | 1.21                                       | 1.25                                       | 1.23                     |
| CHTF18          | 1.43                                       | 0.99                                       | 1.21                     |
| GJB2            | 1.33                                       | 1.10                                       | 1.21                     |
| ACBD7           | 1.28                                       | 1.12                                       | 1.20                     |
| DYNLRB1         | 1.09                                       | 1.29                                       | 1.19                     |
| ERAP1           | 1.38                                       | 1.00                                       | 1.19                     |
| RPS18           | 1.13                                       | 1.25                                       | 1.19                     |
| RGP1            | 1.18                                       | 1.18                                       | 1.18                     |
| IFIT2           | 1.03                                       | 1.31                                       | 1.17                     |
| CAT             | 1.37                                       | 0.97                                       | 1.17                     |
| LOC100506334    | 1.05                                       | 1.28                                       | 1.16                     |
| SOX9            | 1.17                                       | 1.11                                       | 1.14                     |
| MNAT1           | 1.08                                       | 1.16                                       | 1.12                     |
| FLJ43826        | 1.22                                       | 1.02                                       | 1.12                     |
| CST1            | 1.17                                       | 1.07                                       | 1.12                     |
| IFT81           | 1.12                                       | 1.08                                       | 1.10                     |
| THOC7           | 1.20                                       | 1.00                                       | 1.10                     |
| LOC100506455    | 1.29                                       | 0.91                                       | 1.10                     |
| UROD            | 1.19                                       | 1.01                                       | 1.10                     |
| LSG1            | 1.09                                       | 1.10                                       | 1.09                     |
| PAGE5           | 1.14                                       | 1.02                                       | 1.08                     |
| ZNF468          | 1.11                                       | 1.05                                       | 1.08                     |
| ZNF587          | 0.87                                       | 1.25                                       | 1.06                     |
| DHRS7           | 1.03                                       | 1.04                                       | 1.03                     |
| ULK4            | 1.15                                       | 0.91                                       | 1.03                     |
| EZR             | 1.04                                       | 1.03                                       | 1.03                     |
| HTR7            | 1.19                                       | 0.87                                       | 1.03                     |
| TMED7-TICAM2    | 1.19                                       | 0.85                                       | 1.02                     |

Table S6. Sequences for primers and siRNAs used in this study

| Primers for 3'-UTR mutagenesis  | Sequences                                                       |
|---------------------------------|-----------------------------------------------------------------|
| RELA mutant site A (forward)    | 5'-TCCAACCTGCCCAACTTTGTGGATCAGAAGGTTGGAGGGGGAGCCATATTTTATT-3'   |
| RELA mutant site A (reverse)    | 5'-AATAAAATATGGCTCCCCCTCCAACCTTCTGATCCACAAAGTTGGGGCAGTTGG-3'    |
| RELA mutant site B (forward)    | 5'-TTGAGCCCAAAAGCCTTATCAAGTCAGAAGGATCATGGATTACAGCTTAATC-3'      |
| RELA mutant site B (reverse)    | 5'-GATTAAGCTGTAATGAATCCATGATCCTTCTGACTTGATAAGGCTTTGTGGGCTCAA-3' |
| FOS mutant site A (forward)     | 5'-TACAGAGAGGAGAAACACAGAGGAAGTCTAGAGGTTCTCTGTAGAC-3'            |
| FOS mutant site A (reverse)     | 5'-GTCTACAGGAACCCTCTAGTTCCTCTGTGTTTCTCCTCTCTGTA-3'              |
| FOS mutant site B (forward)     | 5'-GTCTCTTTTCTCTTCTCCTGCAAGTGGTGCATAGCATTAACTAATCT-3'           |
| FOS mutant site B (reverse)     | 5'-AGATTAGTTAATGCTATGCACCACTGCAGGAGAAAAGAGAAAAGAGAC-3'          |
| FOS mutant site C (forward)     | 5'-CTGAATGTTCTGACATTAACGACCCTCATGAAAACGTTTTATTGTG-3'            |
| FOS mutant site C (reverse)     | 5'-CACAATAAAACGTTTTTCATGAGGGGTCGTTAATGTGAGAACATTGAG-3'          |
| IKBKE mutant (forward)          | 5'-GTCAAACGACCTCATCACATGAGGAATTCCTCTTCAAGCGTTTCA-3'             |
| IKBKE mutant (reverse)          | 5'-TGAAACGCTTGAAGAGGAATTCCTCATGTGATGAGGTCGTTTGAC-3'             |
| ChIP primers                    |                                                                 |
| NF-κB #1 (forward)              | 5'-TGGAAAGCGGGTACTACCAG-3'                                      |
| NF-κB #1 (reverse)              | 5'-GGGGTTTACAGGGCTCTCG-3'                                       |
| NF-κB #2 (forward)              | 5'-GGTCCCTGGGCAGCGCACT-3'                                       |
| NF-κB #2 (reverse)              | 5'-TTCTCGTTCGGCACTCACTAG-3'                                     |
| NF-κB #3 (forward)              | 5'-AGACGCCATTATCCTCTGTTTC-3'                                    |
| NF-κB #3 (reverse)              | 5'-GGCAGCGGAGGAGCGACAAC-3'                                      |
| NF-κB #4 (forward)              | 5'-AGGTCTCAGTTTTCTACAGCTG-3'                                    |
| NF-κB #4 (reverse)              | 5'-CTCTATCCAGAATGGGGTG-3'                                       |
| NF-κB #5 (forward)              | 5'-CAGGATATTGGGCTTTTGC-3'                                       |
| NF-κB #5 (reverse)              | 5'-GGTAAGCAGAGCAGGAAGAG-3'                                      |
| NF-κB #6 (forward)              | 5'-TGAGTCAACGCACCTGGCTG-3'                                      |
| NF-κB #6 (reverse)              | 5'-TCAGGCCAGGACAAAAGTGAAG-3'                                    |
| NF-κB #7 (forward)              | 5'-TTGGAGCTCAGGAACCCAGG-3'                                      |
| NF-κB #7 (reverse)              | 5'-CCAATGGGATTCGGCTCAG-3'                                       |
| Real-time PCR primers           |                                                                 |
| RelA (forward)                  | 5'-TAAGCAGAAGCATTAACTTCTCTGGA-3'                                |
| RelA (reverse)                  | 5'-CCTGCTTCTGTCTCTAGGAGAGTA-3'                                  |
| Fos (forward)                   | 5'-TAGTTAGTAGCATGTTGAGCCAGG-3'                                  |
| Fos (reverse)                   | 5'-ACCACCTCAACAATGCATGA-3'                                      |
| IKKε (forward)                  | 5'-TGCGTGAGAGTATCAAGC-3'                                        |
| IKKε (reverse)                  | 5'-TACAGGCAGCCACAGAACAG-3'                                      |
| Bcl-xL (forward)                | 5'-TCCTTGTCTACGCTTTCCACG-3'                                     |
| Bcl-xL (reverse)                | 5'-GGTCCATTGTGGCCTTT-3'                                         |
| Cyclin D1 (forward)             | 5'-GGATGCTGGAGGCTGCGAGGAAC-3'                                   |
| Cyclin D1 (reverse)             | 5'-GAGAGGAAGCGTGTGAGGCGTAG-3'                                   |
| c-Myc (forward)                 | 5'-TCAAGAGGCGAACACACAAC-3'                                      |
| c-Myc (reverse)                 | 5'-GGCCTTTTCATTGTTTTCCA-3'                                      |
| Cox-2 (forward)                 | 5'-TTCAAATGAGATTGTGGGAAAAT-3'                                   |
| Cox-2 (reverse)                 | 5'-AGATCATCTCTGCCTGAGTATCTT-3'                                  |
| Tumor necrosis factor (forward) | 5'-CGGGACGTGGAGCTGGCCGAGGAG-3'                                  |
| Tumor necrosis factor (reverse) | 5'-CACCAGCTGTTATCTCACAGTTC-3'                                   |
| interleukin-6 (forward)         | 5'-TCTCCACAAGCGCCTTCG-3'                                        |
| interleukin-6 (reverse)         | 5'-CTCAGGCTGAGATGCCG-3'                                         |
| interleukin-1β (forward)        | 5'-AAACAGATGAAGTCTCCTTCCAGG-3'                                  |
| interleukin-1β (reverse)        | 5'-TGGAGAACCACCTTGTGCTCCA-3'                                    |
| GAPDH (forward)                 | 5'-ATTCCACCCATGGCAAATTC-3'                                      |
| GAPDH (reverse)                 | 5'-TGGGATTTCCATTGATGACAAG-3'                                    |
| siRNAs                          |                                                                 |
| siRELA #1 (sense)               | 5'-GCUGCAGUUUGAUGAUGAATT-3'                                     |
| siRELA #1 (antisense)           | 5'-UUCAUCAUCAAAACUGCAGCTT-3'                                    |
| siRELA #2 (sense)               | 5'-CCUCCUUUCAGGAGAUGAATT-3'                                     |
| siRELA #2 (antisense)           | 5'-UUCAUCUCUGAAAGGAGGTT-3'                                      |
| siRELA #3 (sense)               | 5'-GGACAUUAGAGACCUUCAATT-3'                                     |
| siRELA #3 (antisense)           | 5'-UUGAAGGUCUCAUUAUGUCCTT-3'                                    |
| siFOS #1 (sense)                | 5'-GGGAUAGCCUCUCUUACUATT-3'                                     |
| siFOS #1 (antisense)            | 5'-UAGUAAGAGAGGCUAUCCCTT-3'                                     |
| siFOS #2 (sense)                | 5'-GACAGACCAACUAGAAGAUUTT-3'                                    |
| siFOS #2 (antisense)            | 5'-AUCUUCUAGUUGGUCUGUCTT-3'                                     |

Table S6. Sequences for primers and siRNAs used in this study (Continued)

| Primers for 3'-UTR mutagenesis | Sequences                   |
|--------------------------------|-----------------------------|
| siFOS #3 (sense)               | 5'-CAAGGUGAACAGUUAUCUTT-3'  |
| siFOS #3 (antisense)           | 5'-AGAUAACUGUCCACCUUGTT-3'  |
| siKBKE #1 (sense)              | 5'-GCAUCAUCGAACGGCUAAATT-3' |
| siKBKE #1 (antisense)          | 5'-UUUAGCCGUUCGAUGAUGCTT-3' |
| siKBKE #2 (sense)              | 5'-GCUGUUUGACAAGAUGAATT-3'  |
| siKBKE #2 (antisense)          | 5'-UUCAUCUUGUCCAAACAGCTT-3' |

## References

- Grimson, A., K.K. Farh, W.K. Johnston, P. Garrett-Engele, L.P. Lim, and D.P. Bartel. 2007. MicroRNA targeting specificity in mammals: determinants beyond seed pairing. *Mol. Cell.* 27:91–105. <http://dx.doi.org/10.1016/j.molcel.2007.06.017>
- John, B., A.J. Enright, A. Aravin, T. Tuschl, C. Sander, and D.S. Marks. 2004. Human MicroRNA targets. *PLoS Biol.* 2:e363.
- Krek, A., D. Grün, M.N. Poy, R. Wolf, L. Rosenberg, E.J. Epstein, P. MacMenamin, I. da Piedade, K.C. Gunsalus, M. Stoffel, and N. Rajewsky. 2005. Combinatorial microRNA target predictions. *Nat. Genet.* 37:495–500. <http://dx.doi.org/10.1038/ng1536>
